# Supplementary material for: Solar-driven active and reusable immobilized fluorine-doped ZrO2−x thin film photocatalyst for dye-contaminated water
Source: Royal Society of Chemistry journal article supplement (doi:10.1039/d6ra01876a), 2026-04-27
Supplement: d6ra01876a1.pdf [file d6ra01876a1.pdf]

## Supplementary Information

### **Solar-driven active and reusable immobilized fluorine-doped ZrO<sub>2-x</sub> thin film photocatalyst for dye-contaminated water**

*Mohamed S. Attia<sup>1</sup>, Faisal K. Algethami<sup>1</sup>, Mahmoud S. Abdel-Wahed<sup>2</sup>, M.  
Obaida<sup>3\*</sup>, Amer S. El-Kalliny<sup>2</sup>*

<sup>1</sup>*Chemistry Department, College of Science, Imam Mohammad Ibn Saud Islamic University  
(IMSIU), Riyadh 11623, Saudi Arabia*

<sup>2</sup>*Water Pollution Research Department, National Research Centre, 33 El Buhouth St., Dokki,  
12622 Giza, Egypt*

<sup>3</sup>*Solid State Physics Department, Physics Research Institute, National Research Centre, 33 El  
Buhouth St., Dokki, 12622 Giza, Egypt*

---

\* **Corresponding Author:** Mohamed Obaida; email: [mohamed.obaida@rub.de](mailto:mohamed.obaida@rub.de) ; [mz.obaida@nrc.sci.eg](mailto:mz.obaida@nrc.sci.eg)

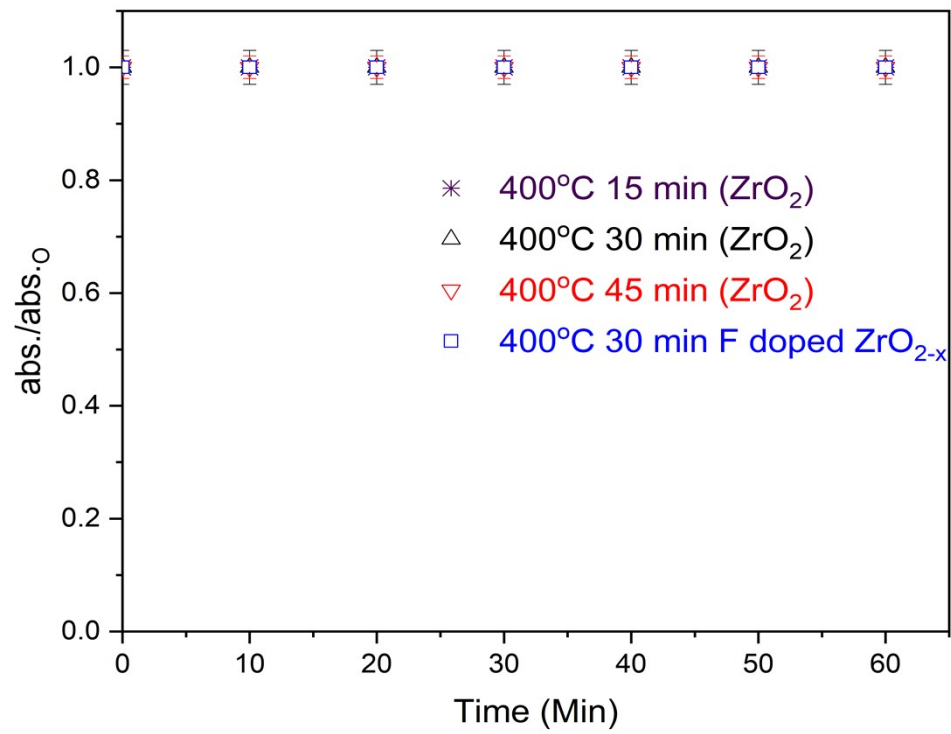

**Fig. S1 The adsorption profile of ZrO<sub>2</sub> deposited at 400°C for (15, 30, and 45 min) and F-doped ZrO<sub>2-x</sub> (400°C/30 min) thin films prepared, RR =10 mg/L at natural pH.**
